# Supplementary material for: Catalyst-free visible-light-induced condensation to synthesize bis(indolyl)methanes and biological activity evaluation of them as potent human carboxylesterase 2 inhibitors
Source: Royal Society of Chemistry journal article supplement (doi:10.1039/c9ra08593a), 2019-01-01
Supplement: c9ra08593a1.pdf [file c9ra08593a1.pdf]

# Catalyst-free visible-light-induced condensation to synthesize bis(indolyl)methanes and biological activity evaluation of them as potent human carboxylesterase 2 inhibitors

Yi-Shu Zhao <sup>a,1</sup>, Hong-Li Ruan <sup>b,1</sup>, Xiu-Yang Wang <sup>a</sup>, Chen Chen <sup>b</sup>, Pei-Fang Song <sup>a</sup>, Cheng-Wei Lü <sup>b,\*</sup>, Li-Wei Zou <sup>a,\*</sup>

Institute of Interdisciplinary Integrative Medicine Research, Shanghai University of Traditional Chinese Medicine, Shanghai 201203, People's Republic of China

School of Chemistry and Chemical Engineering, Liaoning Normal University, Dalian 116029, People's Republic of China

\*Corresponding author

E-mail addresses: chengweilv@126.com (C.-W. Lv), chemzlw@shutcm.edu.cn (L.-W. Zou)

## Contents:

|                                                                                |    |
|--------------------------------------------------------------------------------|----|
| 1. NMR dates for bis(indolyl)methanes <b>4a-4p</b> -----                       | 2  |
| 2. NMR spectra of <b>4a-4p</b> -----                                           | 5  |
| 3. <b>SI Fig. 1</b> The inhibitory effects of indole derivatives on CES1 ----- | 13 |

**3,3'-(phenylmethylene)bis(2-methyl-1H-indole) (4a).** Pale pink solid; mp = 262-263 °C (243-245 <sup>lit 1</sup>); <sup>1</sup>H NMR (500 MHz, DMSO-*d*<sub>6</sub>) δ: 10.72 (s, 2H), 7.27-7.18 (m, 7H), 6.91-6.87 (m, 2H), 6.81 (d, *J* = 7.9 Hz, 2H), 6.69-6.66 (m, 2H), 5.93 (s, 1H), 2.07 (s, 6H).

**3,3'-(*o*-tolylmethylene)bis(2-methyl-1H-indole) (4b).** Pale pink solid; mp = 263-265 °C (255 <sup>lit 2</sup>); <sup>1</sup>H NMR (500 MHz, DMSO-*d*<sub>6</sub>) δ: 10.69 (s, 2H), 7.21 (d, *J* = 8.0 Hz, 2H), 7.16-7.11 (m, 2H), 7.03 (d, *J* = 2.9 Hz, 2H), 6.89 (t, *J* = 7.5 Hz, 2H), 6.77 (d, *J* = 7.9 Hz, 2H), 6.66 (t, *J* = 7.5 Hz, 2H), 5.88 (s, 1H), 2.13 (s, 3H), 2.00 (s, 6H).

**3,3'-(*m*-tolylmethylene)bis(2-methyl-1H-indole) (4c).** Pale pink solid; mp = 260-262 °C (181-184 <sup>lit 3</sup>); <sup>1</sup>H NMR (500 MHz, DMSO-*d*<sub>6</sub>) δ: 10.70 (s, 2H), 7.21 (d, *J* = 7.9 Hz, 2H), 7.14-7.11 (m, 1H), 7.05-6.82 (m, 7H), 6.67 (t, *J* = 7.4 Hz, 2H), 5.88 (s, 1H), 2.21 (s, 3H), 2.05 (s, 6H).

**3,3'-(*p*-tolylmethylene)bis(2-methyl-1H-indole) (4d).** Pale pink solid; mp = 225-227 °C (175-176 <sup>lit 1</sup>); <sup>1</sup>H NMR (500 MHz, DMSO-*d*<sub>6</sub>) δ: 10.69 (s, 2H), 7.21 (d, *J* = 8.0 Hz, 2H), 7.08-7.04 (m, 4H), 6.90-6.87 (t, *J* = 7.5 Hz, 2H), 6.84-6.82 (d, *J* = 7.9 Hz, 2H), 6.69 (t, *J* = 7.9 Hz, 2H), 5.87 (s, 1H), 2.28 (s, 3H), 2.06 (s, 6H).

**3,3'-((2-methoxyphenyl)methylene)bis(2-methyl-1H-indole) (4e).** Pale pink solid; mp = 252-254 °C (240-242 <sup>lit 4</sup>); <sup>1</sup>H NMR (500 MHz, DMSO-*d*<sub>6</sub>) δ: 10.61 (s, 2H), 7.23-7.18 (m, 3H), 7.07 (dd, *J* = 7.6, 1.6 Hz, 1H), 7.00 (d, *J* = 7.6 Hz, 1H), 6.88-6.85 (m, 2H), 6.82-6.77 (m, 3H), 6.67-6.63 (m, 2H), 6.09 (s, 1H), 3.67 (s, 3H), 1.97 (s, 6H).

**3,3'-((3-methoxyphenyl)methylene)bis(2-methyl-1H-indole) (4f).** Pale pink solid; mp = 250-253 °C (237-239 <sup>lit 5</sup>); <sup>1</sup>H NMR (500 MHz, DMSO-*d*<sub>6</sub>) δ: 10.71 (s, 2H), 7.22-7.15 (m, 3H), 6.91-6.87 (m, 2H), 6.84 (d, *J* = 7.9 Hz, 2H), 6.80-6.74 (m, 3H), 6.70-6.67 (m, 2H), 5.89 (s, 1H), 3.63 (s, 3H), 2.07 (s, 6H).

**3,3'-((4-methoxyphenyl)methylene)bis(2-methyl-1H-indole) (4g).** Pale pink solid; mp = 217-220 °C (194-195 <sup>lit 5</sup>); <sup>1</sup>H NMR (500 MHz, DMSO-*d*<sub>6</sub>) δ: 10.68 (s, 2H), 7.20 (d, *J* = 8.0 Hz, 2H), 7.08 (d, *J* = 8.5 Hz, 2H), 6.90-6.81 (m, 6H), 6.69-6.66 (m, 2H), 5.85 (s, 1H), 3.72 (s, 3H), 2.06 (s, 6H).

**3,3'-((2-chlorophenyl)methylene)bis(2-methyl-1H-indole) (4h).** Pale pink solid; mp = 276-278 °C (233-234 <sup>lit 4</sup>); <sup>1</sup>H NMR (500 MHz, DMSO-*d*<sub>6</sub>) δ: 10.77 (s, 2H), 7.31 (d, *J* = 8.5 Hz, 2H), 7.24-7.18 (m, 4H), 6.92-6.89 (m, 2H), 6.82 (d, *J* = 7.9 Hz, 2H), 6.72-6.69 (m, 2H), 5.93 (s, 1H), 2.04 (s, 6H).

**3,3'-((3-chlorophenyl)methylene)bis(2-methyl-1H-indole) (4i).** Pale pink solid; mp = 280-283 °C (265-266 <sup>lit 6</sup>); <sup>1</sup>H NMR (500 MHz, DMSO-*d*<sub>6</sub>) δ: 10.79 (s, 2H), 7.31-7.15 (m, 6H), 6.91 (t, *J* = 7.5 Hz, 2H), 6.81 (d, *J* = 8.0 Hz, 2H), 6.71 (t, *J* = 7.5 Hz, 2H), 5.96 (s, 1H), 2.10 (s, 6H).

**3,3'-((4-chlorophenyl)methylene)bis(2-methyl-1H-indole) (4j).** Pale pink solid; mp = 249-251 °C (202-204 <sup>lit 6</sup>); <sup>1</sup>H NMR (500 MHz, DMSO-*d*<sub>6</sub>) δ: 10.76 (s, 2H), 7.31 (d, *J* = 7.1 Hz, 2H), 7.23-7.18 (m, 4H), 6.90 (t, *J* = 7.5 Hz, 2H), 6.81 (d, *J* = 7.9 Hz, 2H), 6.70 (t, *J* = 7.5 Hz, 2H), 5.92 (s, 1H), 2.08 (s, 6H).

**3,3'-((2-bromophenyl)methylene)bis(2-methyl-1H-indole) (4k).** Pale pink solid; mp = 250-253 °C (138-140 <sup>lit 1</sup>); <sup>1</sup>H NMR (500 MHz, DMSO-*d*<sub>6</sub>) δ: 10.75 (s, 2H), 7.61 (dd, *J* = 7.1, 0.9 Hz, 1H), 7.28-7.15 (m, 5H), 6.92-6.88 (m, 2H), 6.76 (d, *J* = 7.9 Hz, 2H), 6.70-6.67 (m, 2H), 6.03 (s, 1H), 2.00 (s, 6H).

**3,3'-((3-bromophenyl)methylene)bis(2-methyl-1H-indole) (4l).** Pale pink solid; mp = 226-228 °C (150-153 <sup>lit 1</sup>); <sup>1</sup>H NMR (500 MHz, DMSO-*d*<sub>6</sub>) δ: 10.79 (s, 2H), 7.41 (d, *J* = 7.5 Hz, 1H), 7.33 (s, 1H), 7.21-7.19 (m, 4H), 6.91 (t, *J* = 7.5 Hz, 2H), 6.81 (d, *J* = 7.9 Hz, 2H), 6.70 (t, *J* = 7.5 Hz, 2H), 5.95 (s, 1H), 2.09 (s, 6H).

**3,3'-((4-bromophenyl)methylene)bis(2-methyl-1H-indole) (4m).** Pale pink solid; mp = 252-254 °C (145-148 <sup>lit 1</sup>); <sup>1</sup>H NMR (500 MHz, DMSO-*d*<sub>6</sub>) δ: 10.77 (s, 2H), 7.44 (d, *J* = 8.3 Hz, 2H), 7.23 (d, *J* = 8.0 Hz, 2H), 7.13 (d, *J* = 8.4 Hz, 2H), 6.90 (t, *J* = 7.5 Hz, 2H), 6.82 (d, *J* = 7.9 Hz, 2H), 6.70 (t, *J* = 7.5 Hz, 2H), 5.91 (s, 1H), 2.08 (s, 6H).

**3,3'-((2-nitrophenyl)methylene)bis(2-methyl-1H-indole) (4n).** Yellow solid; mp = 258-261 °C (248-249 <sup>lit 4</sup>); <sup>1</sup>H NMR (500 MHz, DMSO-*d*<sub>6</sub>) δ: 10.85 (s, 2H), 8.16 (d, *J* = 8.8 Hz, 2H), 7.43 (d, *J* = 8.6 Hz, 2H), 7.25 (d, *J* = 8.0 Hz, 2H), 6.92 (t, *J* = 7.5 Hz, 2H), 6.81 (d, *J* = 7.9 Hz, 2H), 6.71 (t, *J* = 7.9 Hz, 2H), 6.08 (s, 1H), 2.10 (s, 6H).

**3,3'-((3-nitrophenyl)methylene)bis(2-methyl-1H-indole) (4o).** Yellow solid; mp = 283-286 °C (278-280 <sup>lit6</sup>); <sup>1</sup>H NMR (500 MHz, DMSO-*d*<sub>6</sub>)  $\delta$ : 10.75 (s, 2H), 8.10 (d, *J* = 7.9 Hz, 1H), 8.00 (s, 1H), 7.65 (d, *J* = 7.7 Hz, 1H), 7.57 (t, *J* = 7.9 Hz, 1H), 7.25 (d, *J* = 8.0 Hz, 2H), 6.92 (t, *J* = 8.0 Hz, 2H), 6.80 (d, *J* = 7.9 Hz, 2H), 6.71 (t, *J* = 8.0 Hz, 2H), 5.96 (s, 1H), 2.10 (s, 6H).

**3,3'-((4-nitrophenyl)methylene)bis(2-methyl-1H-indole) (4p).** Yellow solid; mp = 271-272 °C (240-242 <sup>lit 1</sup>); <sup>1</sup>H NMR (500 MHz, DMSO-*d*<sub>6</sub>)  $\delta$ : 10.82 (s, 2H), 7.83 (dd, *J* = 7.9, 1.2 Hz, 1H), 7.57 (td, *J* = 7.6, 1.2 Hz, 1H), 7.51-7.48 (m, 1H), 7.27 (d, *J* = 7.6 Hz, 1H), 7.22 (d, *J* = 8.0 Hz, 2H), 6.93-6.89 (m, 2H), 6.74-6.68 (m, 4H), 6.58 (s, 1H), 2.03 (s, 6H).

## References

1. Kalla R M N, Hong S C, Kim I. Synthesis of bis(indolyl)methanes using hyper-cross-linked polyaromatic spheres decorated with bromomethyl groups as efficient and recyclable catalysts[J]. ACS Omega, 2018, 3(2): 2242-2253.
2. Tayeb R, Amini M M, Abdollahi N, et al. Magnetic inorganic-organic hybrid nanomaterial for the catalytic preparation of bis (indolyl) arylmethanes under solvent-free conditions: Preparation and characterization of H<sub>5</sub>PW<sub>10</sub>V<sub>2</sub>O<sub>40</sub>/pyridino-Fe<sub>3</sub>O<sub>4</sub> nanoparticles[J]. Applied Catalysis A: General, 2013, 468: 75-87.
3. Qu H E, Xiao C, Wang N, et al. RuCl<sub>3</sub>·3H<sub>2</sub>O catalyzed reactions: Facile synthesis of bis(indolyl)methanes under mild conditions[J]. Molecules, 2011, 16(5): 3855-3868.
4. Naeimi A, Honarmand M, Salandari N. First biomimetic electrospun polymer from *Carthamus tinctorius* plant for sustainable synthesis of bis (1H-indol-3-yl)methanes[J]. Polymer, 2018, 159: 181-190.
5. Banari H, Kiyani H, Pourali A. Efficient synthesis of bis(indolyl)methanes, bispyrazoles and biscoumarins using 4-sulfophthalic acid[J]. Research on Chemical Intermediates, 2017, 43(3): 1635-1649.
6. Zolfigol M A, Ayazi-Nasrabadi R, Bagheri S. The first urea-based ionic liquid-stabilized magnetic nanoparticles: an efficient catalyst for the synthesis of bis (indolyl) methanes and pyrano [2,3-d] pyrimidinone derivatives[J]. Applied Organometallic Chemistry, 2016, 30(5): 273-281.

## 2. NMR spectra of 4a-4p

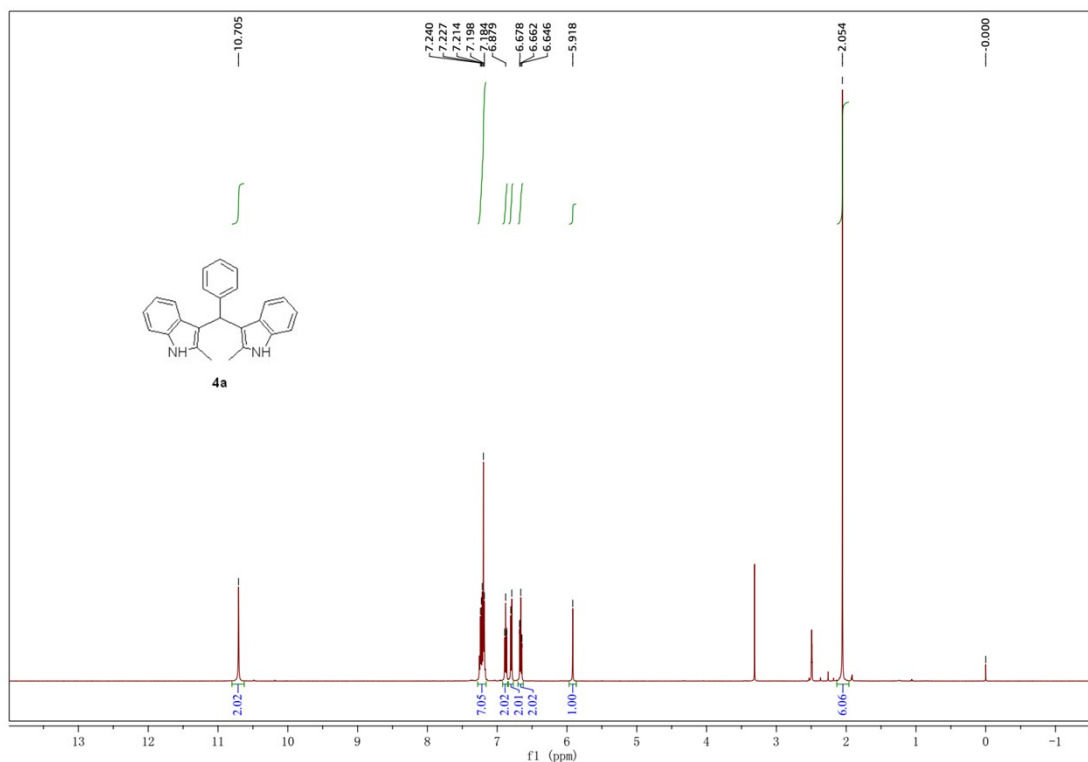

<sup>1</sup>H NMR spectra of 4a

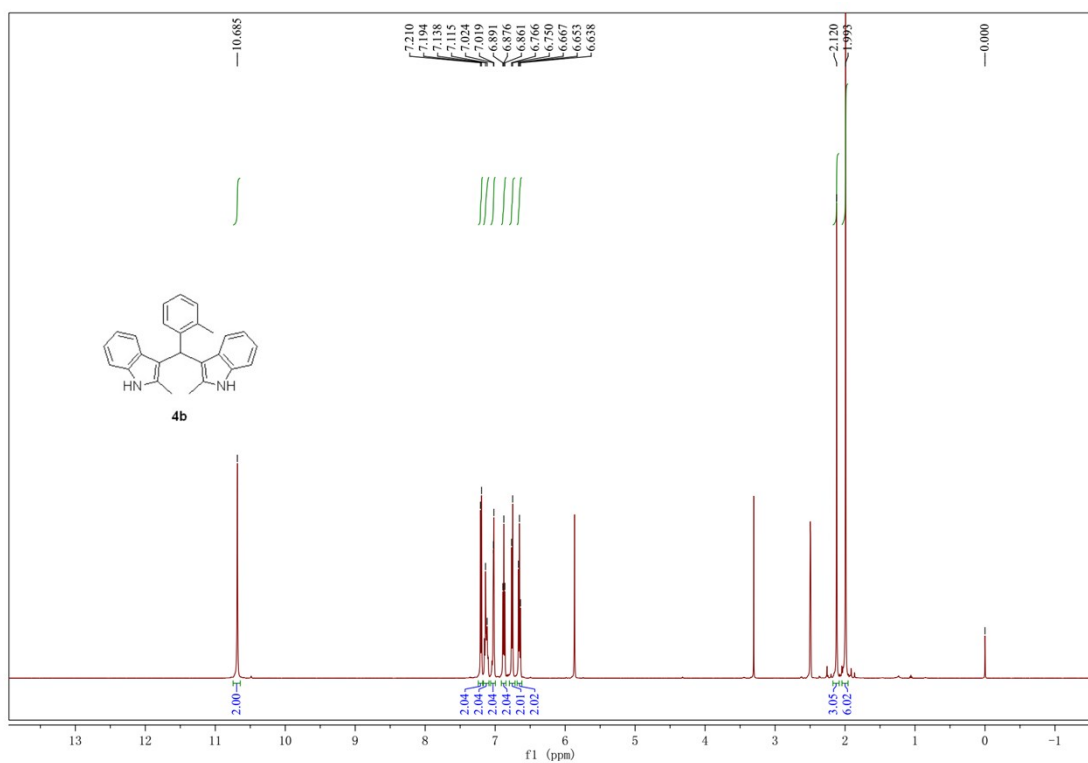

<sup>1</sup>H NMR spectra of 4b

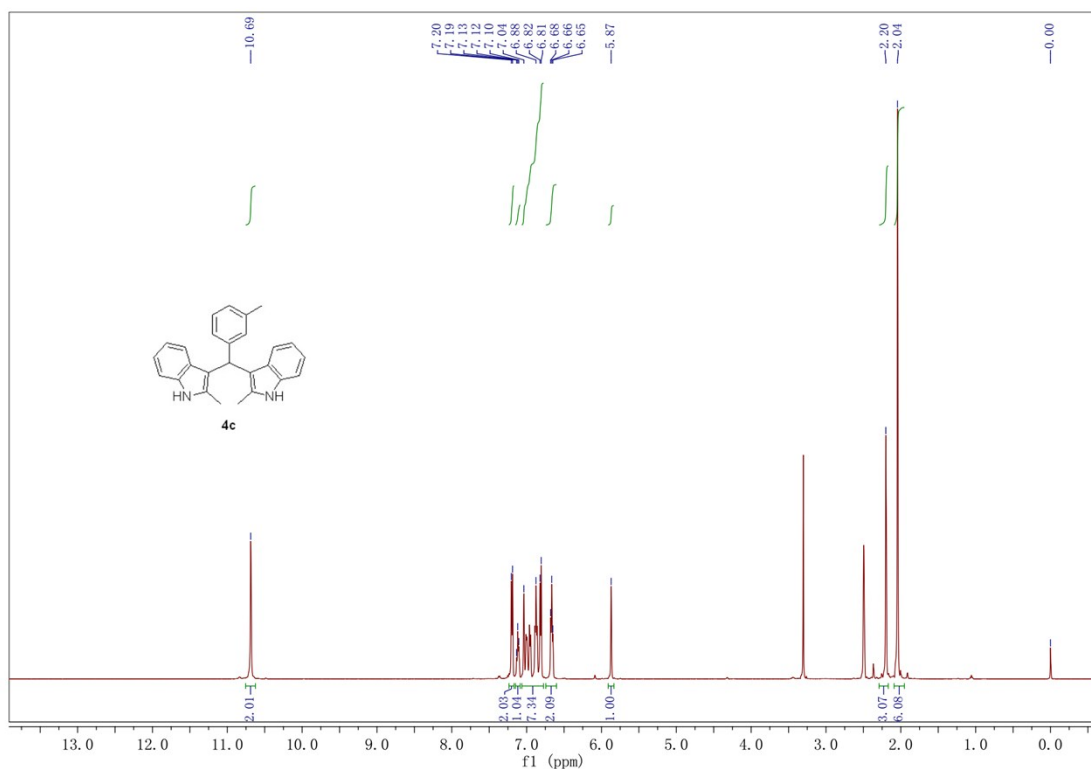

<sup>1</sup>H NMR spectra of 4c

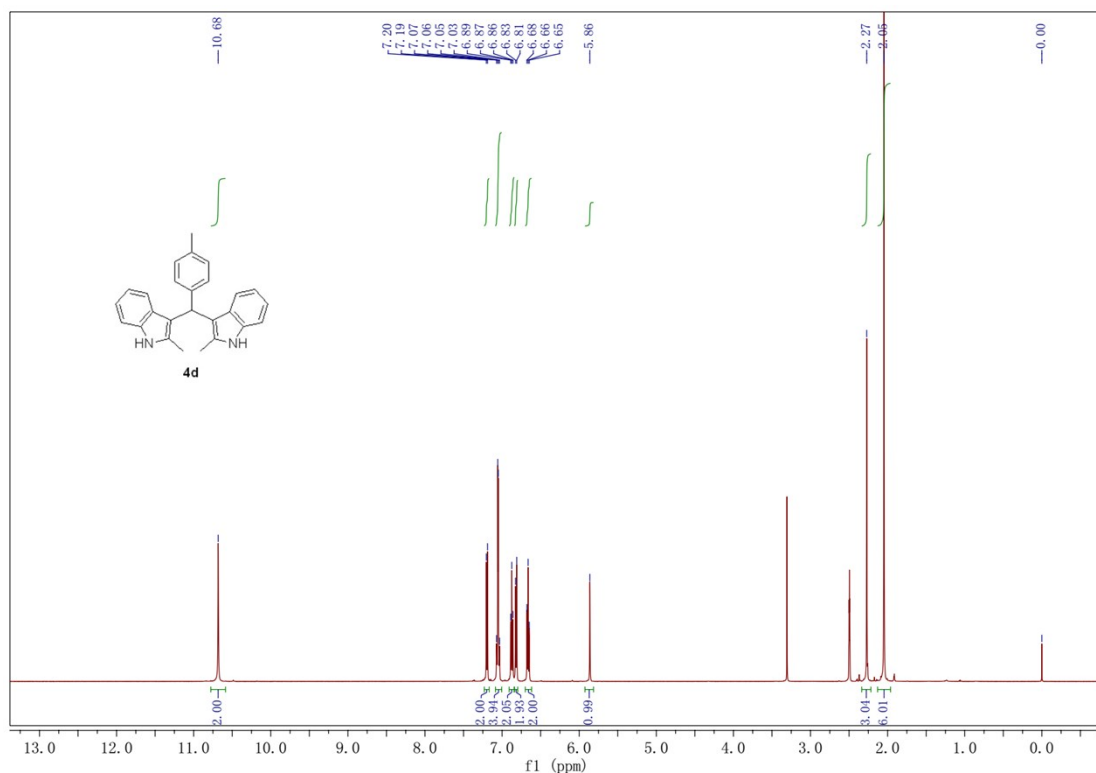

<sup>1</sup>H NMR spectra of 4d

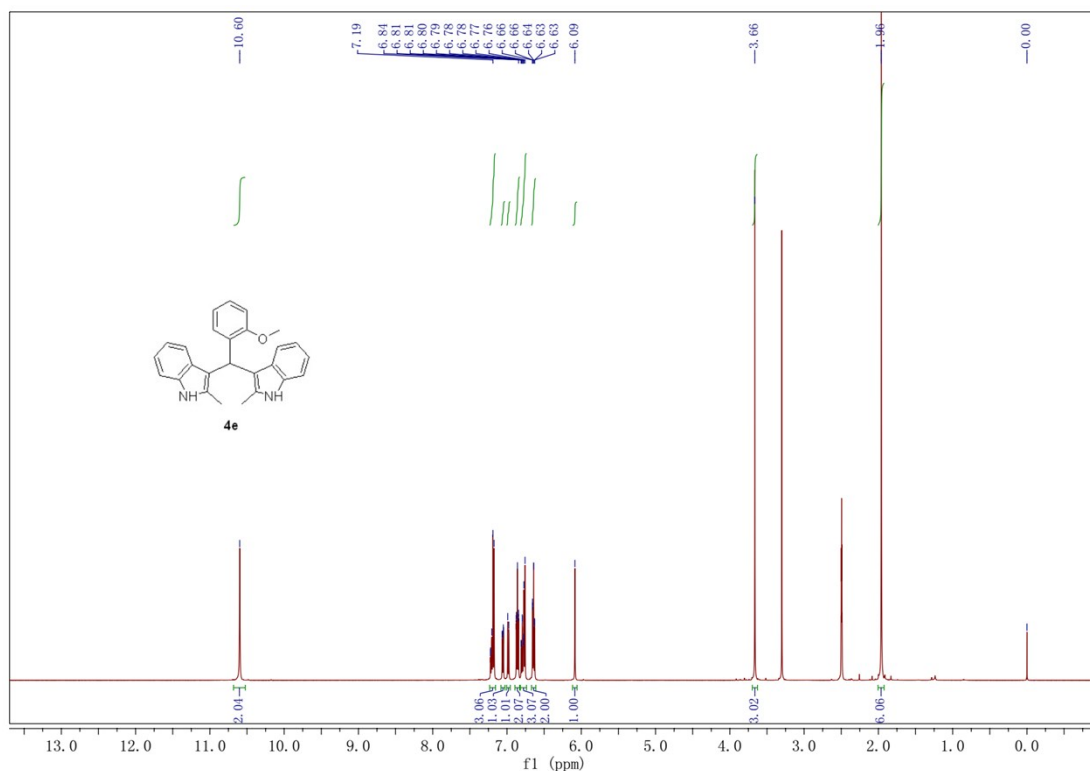

<sup>1</sup>H NMR spectra of 4e

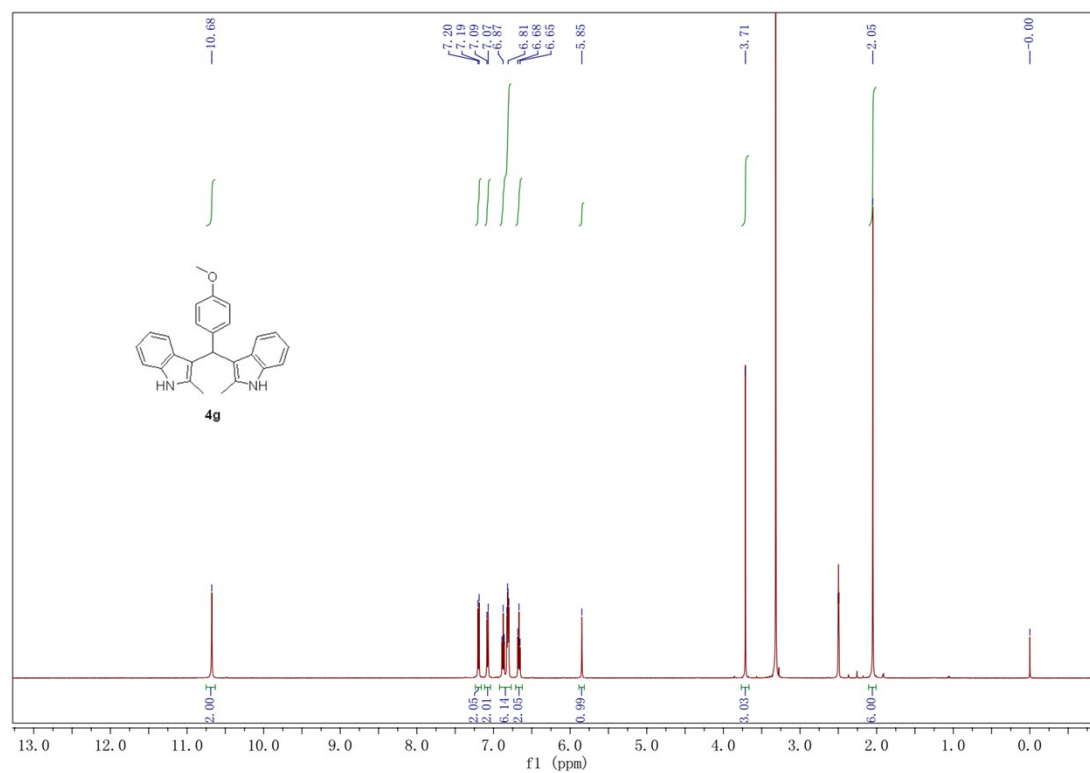

<sup>1</sup>H NMR spectra of 4f

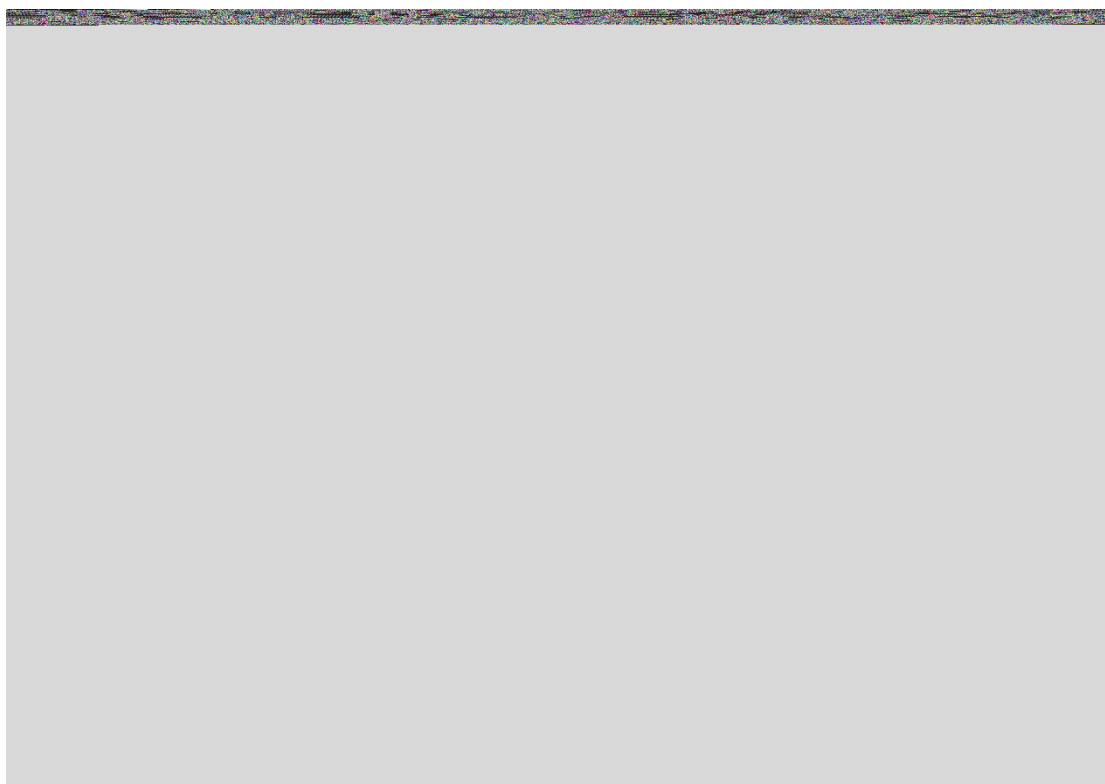

<sup>1</sup>H NMR spectra of 4g

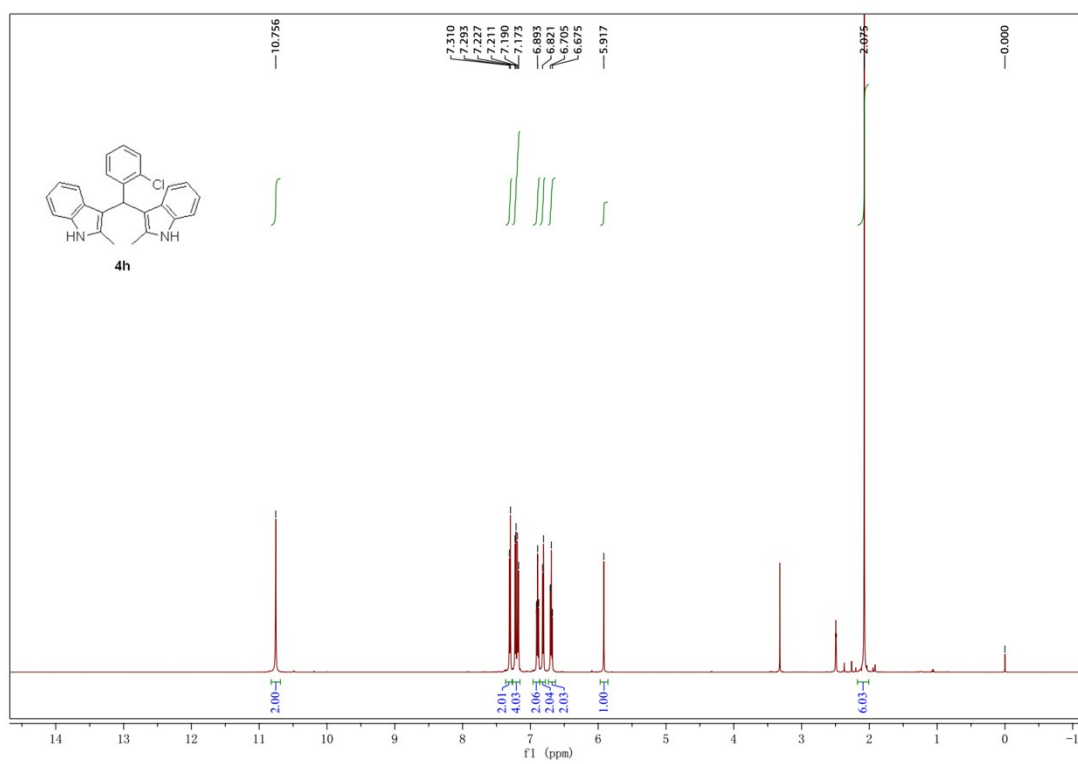

<sup>1</sup>H NMR spectra of 4h



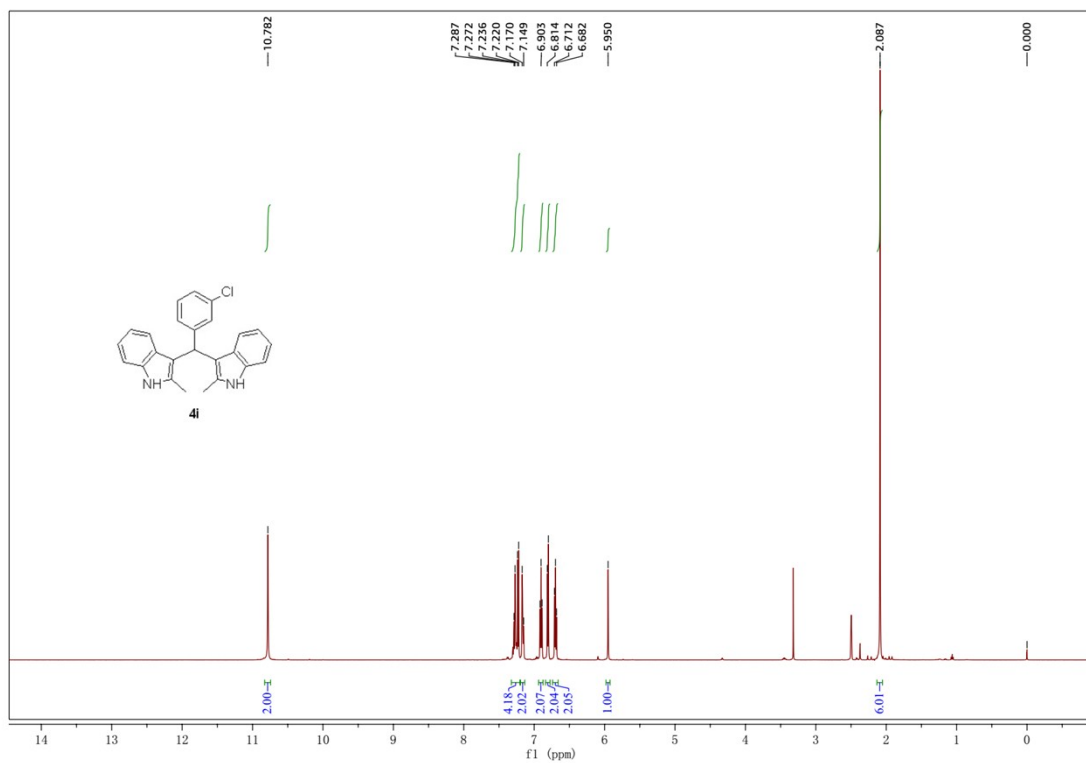

<sup>1</sup>H NMR spectra of 4i

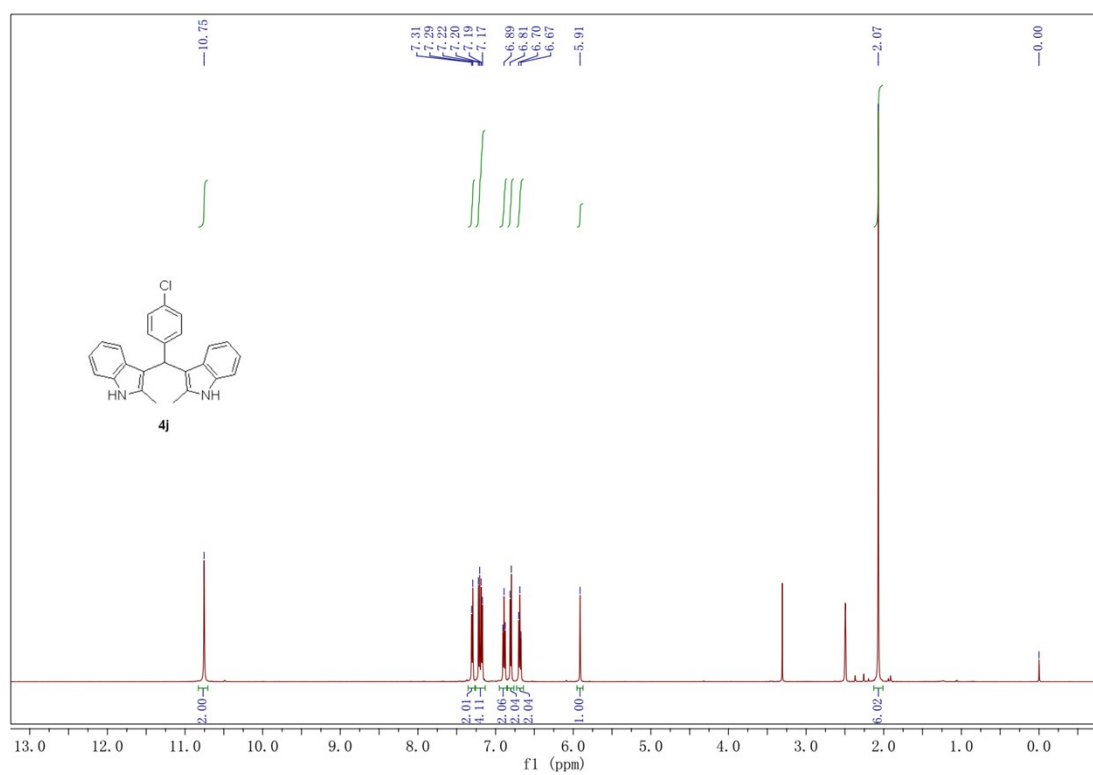

<sup>1</sup>H NMR spectra of 4j

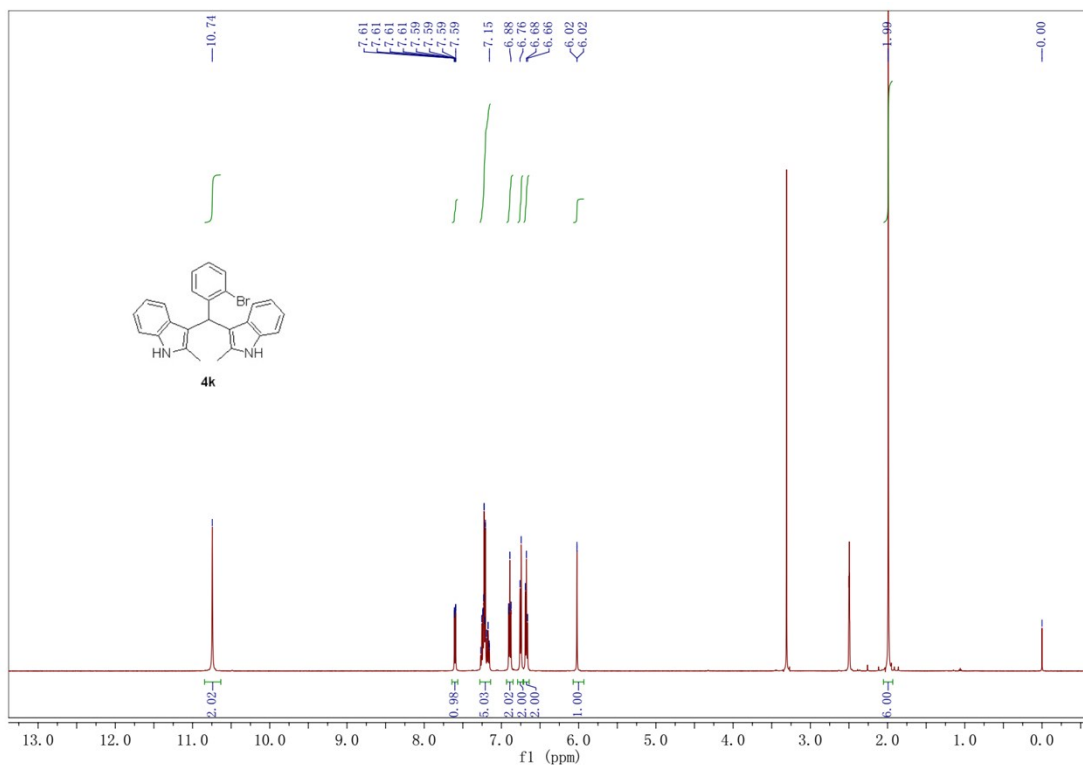

<sup>1</sup>H NMR spectra of 4k

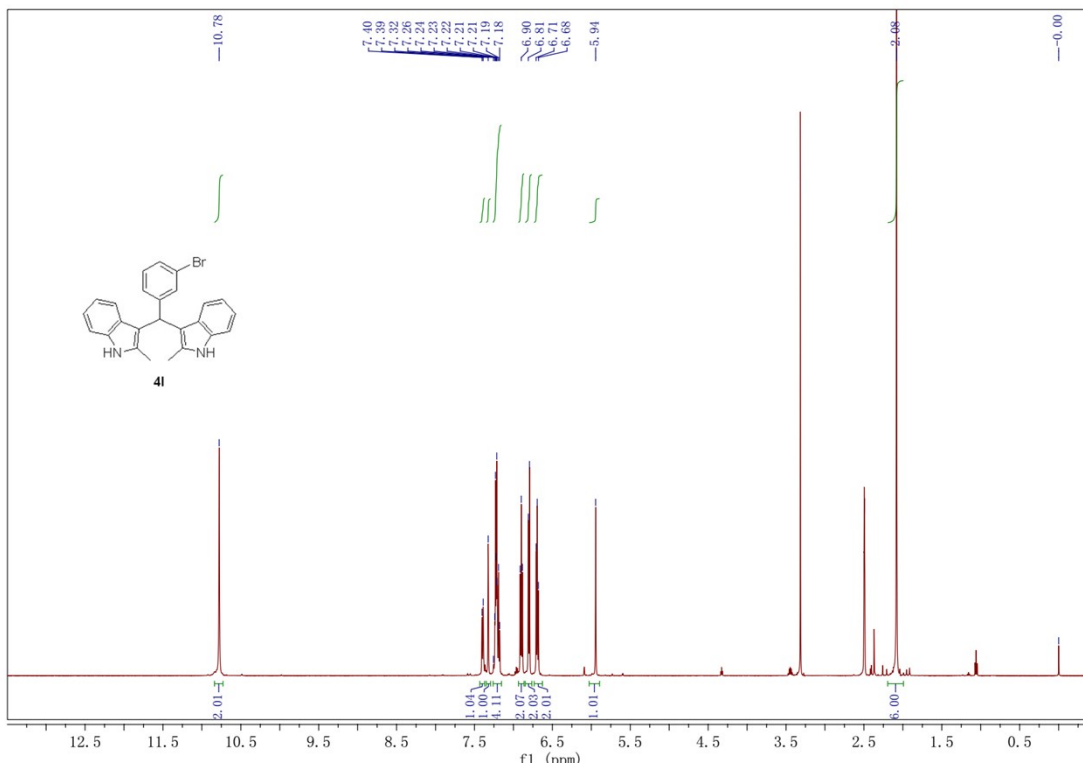

<sup>1</sup>H NMR spectra of 4l

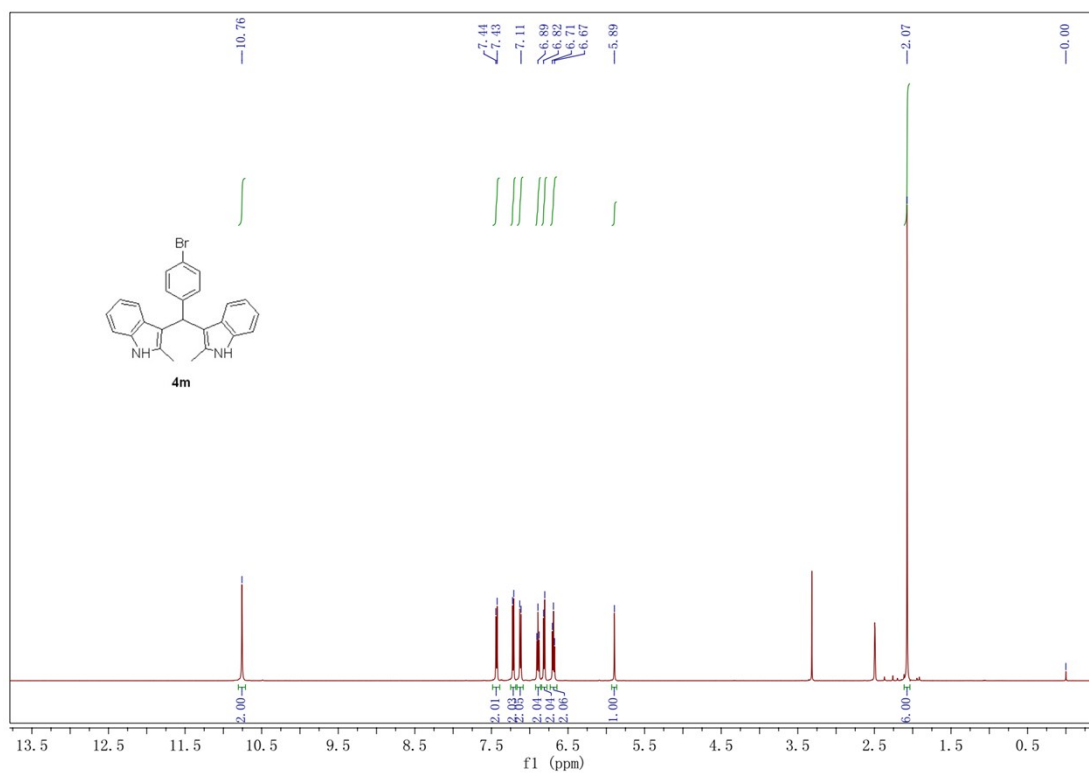

<sup>1</sup>H NMR spectra of **4m**

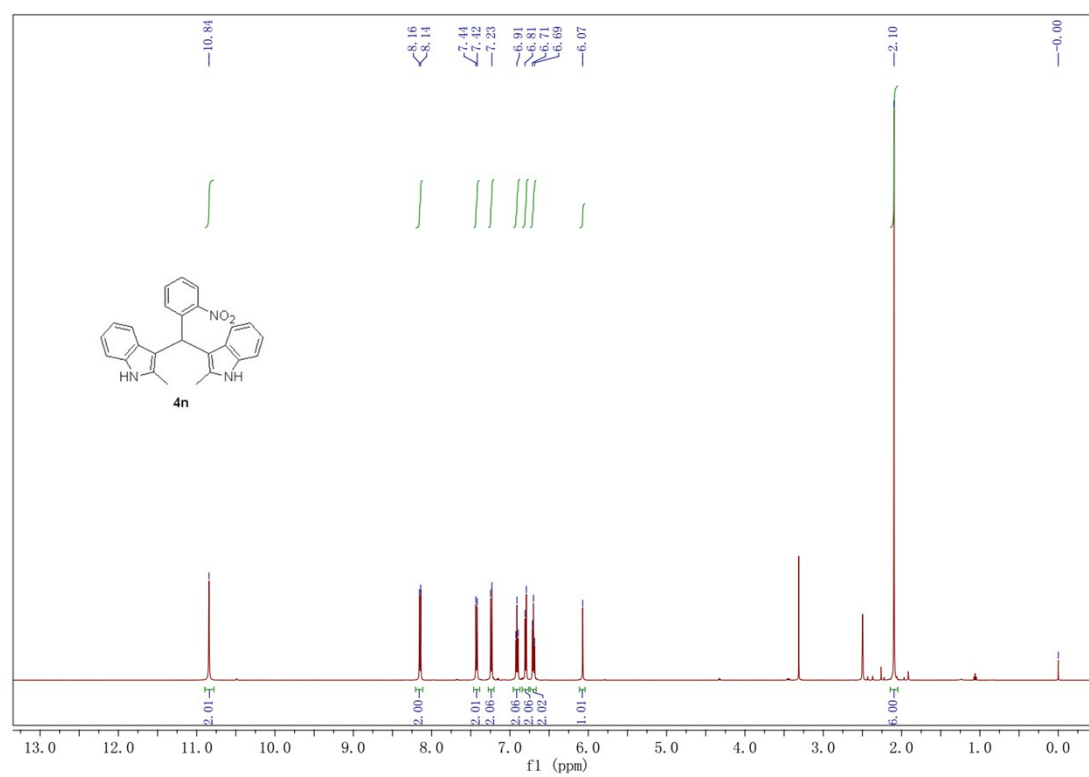

<sup>1</sup>H NMR spectra of **4n**

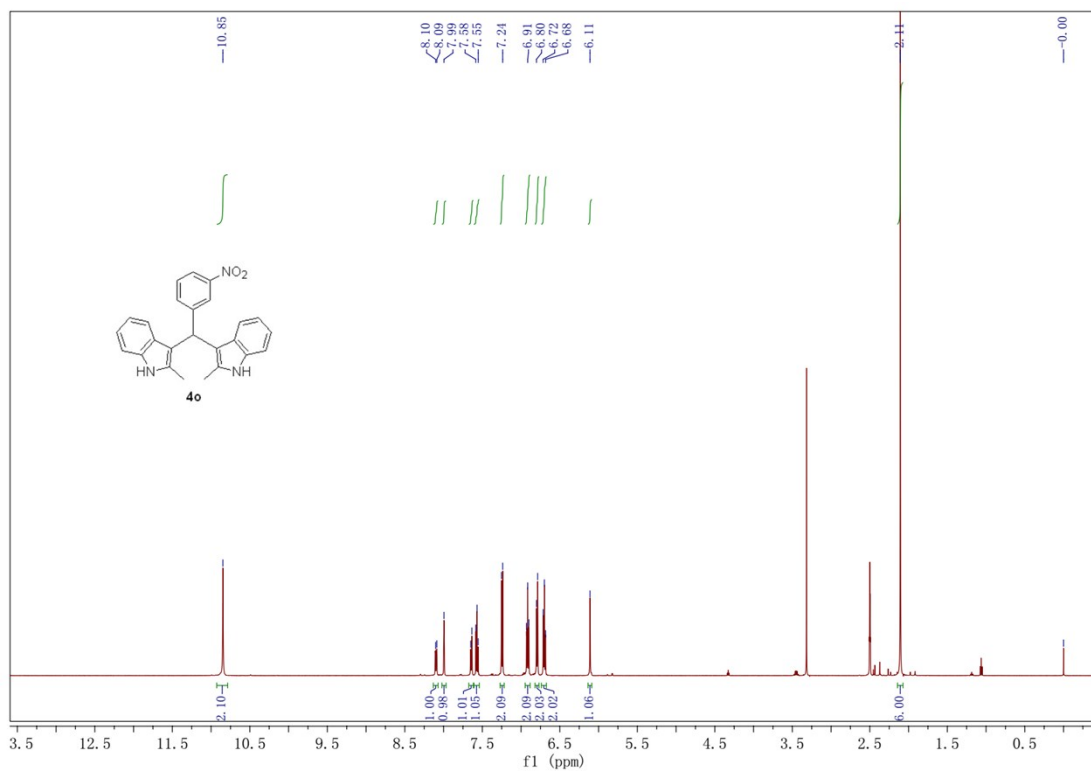

<sup>1</sup>H NMR spectra of 4o

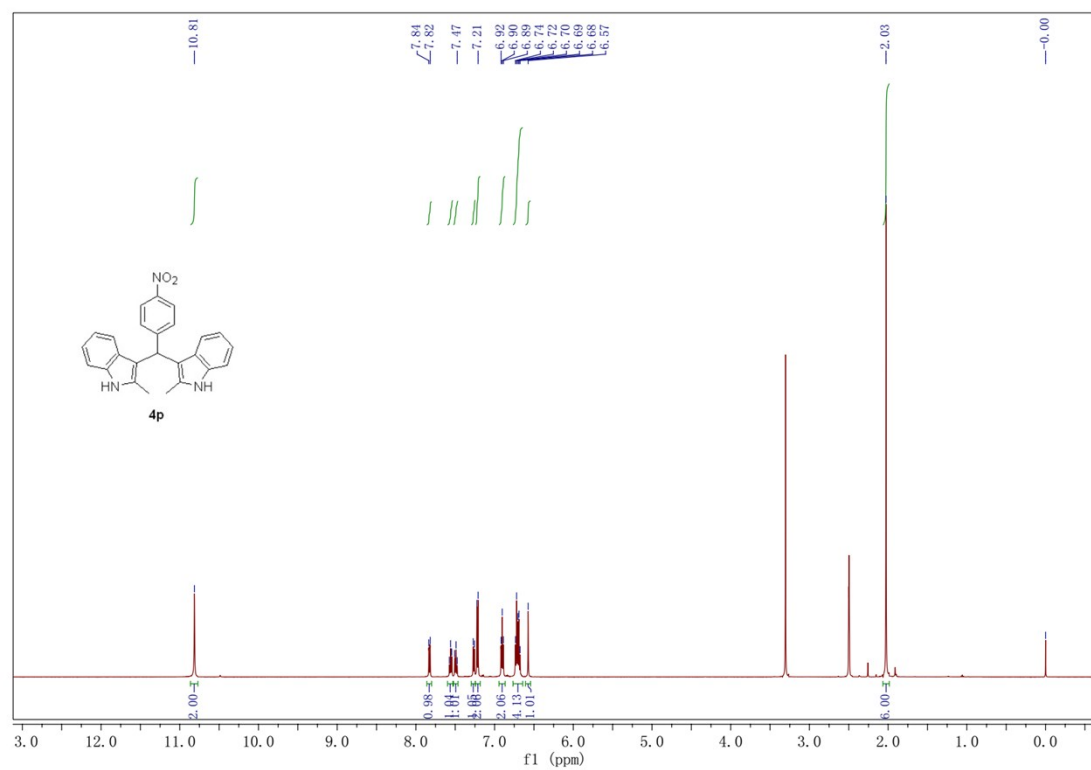

<sup>1</sup>H NMR spectra of 4p

### 3. The inhibitory effects of indole derivatives on CES1

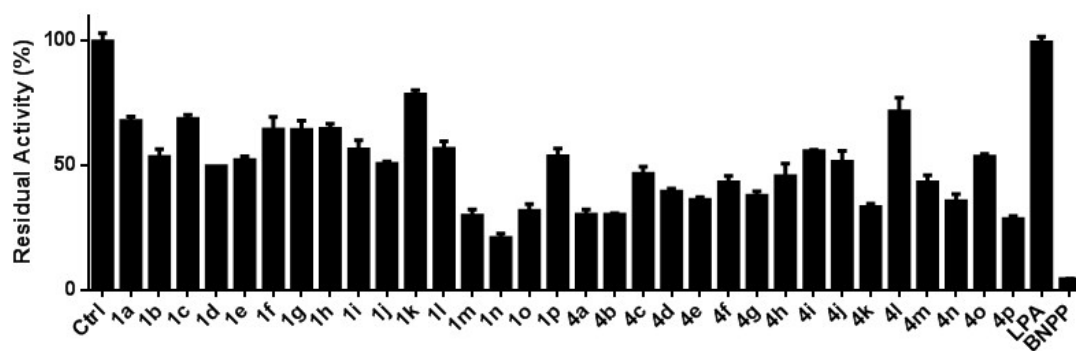

**SI Fig. 1** The inhibitory effects of all indole derivatives (10  $\mu$ M, final concentration) on the catalytic activities of CES1-mediated DME hydrolysis.
